# Supplementary material
Source: Springer Nature journal article supplement (https://www.springermedizin.de/resource/supplementary/12936_2013_3713_MOESM1_ESM.pdf/9545178)

Normal liver

Malaria without hyperbilirubinemia

Malaria with hyperbilirubinemia

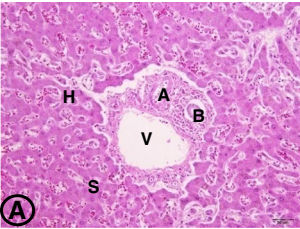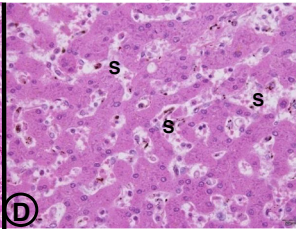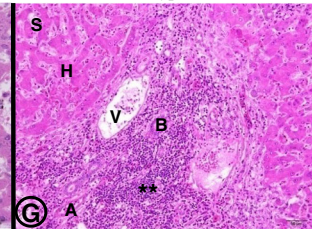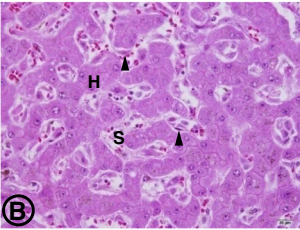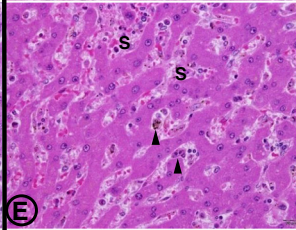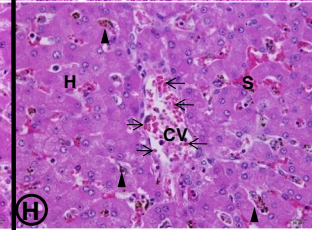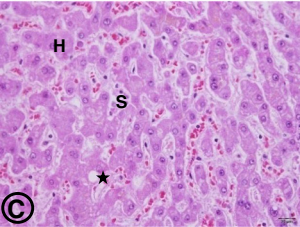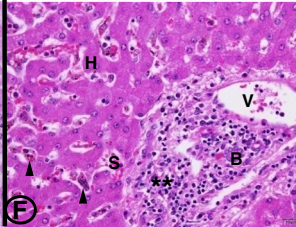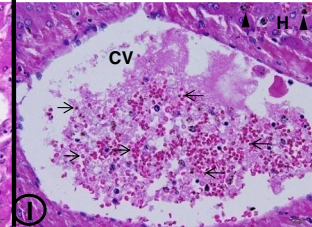

Supplement: MOESM1 [file 9545178]
